# Supplementary material
Source: PubMed Central journal article supplement (PMC6446895)

**Control**

Left

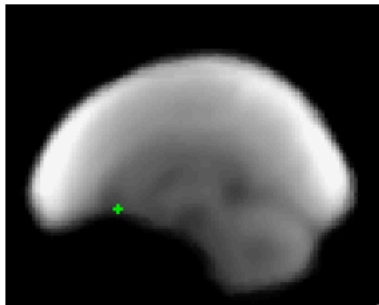

Right

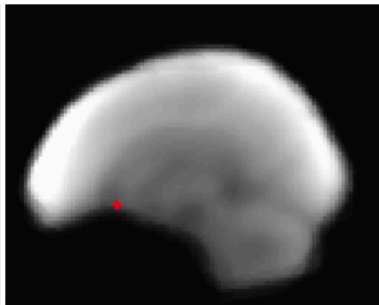

**MDD**

Left

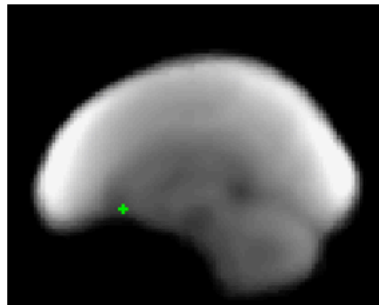

Right

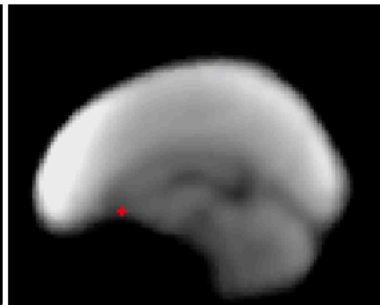

Supplement: NIHMS1521176-supplement-1.pdf [file NIHMS1521176-supplement-1.pdf]

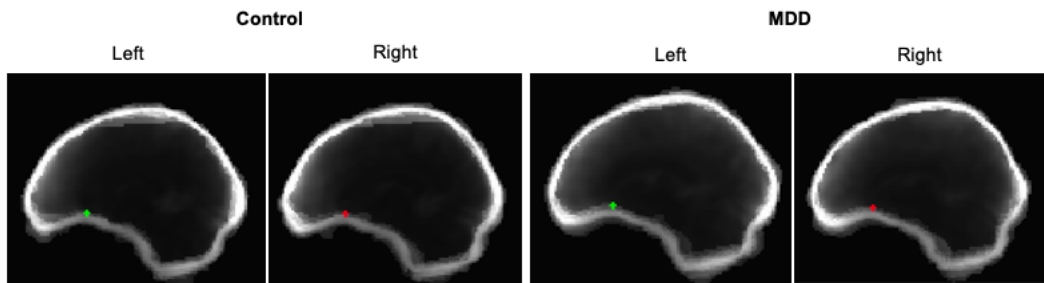

Supplement: NIHMS1521176-supplement-2.pdf [file NIHMS1521176-supplement-2.pdf]

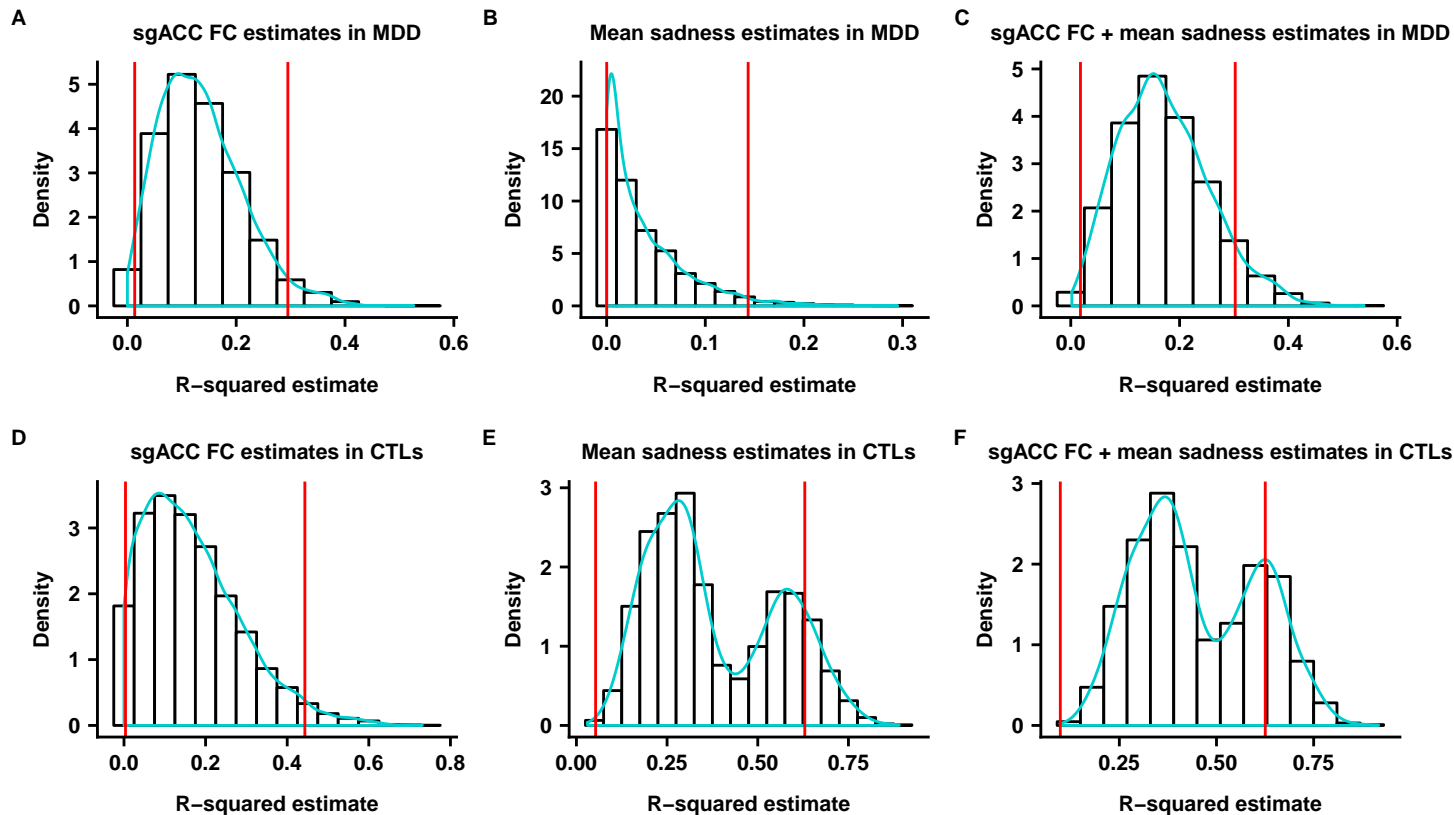

Supplement: NIHMS1521176-supplement-3.pdf [file NIHMS1521176-supplement-3.pdf]
